# Supplementary material for: Dectin-1 ligands produce distinct training phenotypes in human monocytes through differential activation of signaling networks
Source: PubMed Central journal article supplement (PMC10791629; doi:10.1038/s41598-024-51620-8), 2024-01-17
Supplement: 41598_2024_51620_MOESM1_ESM.pdf [file 41598_2024_51620_MOESM1_ESM.pdf]

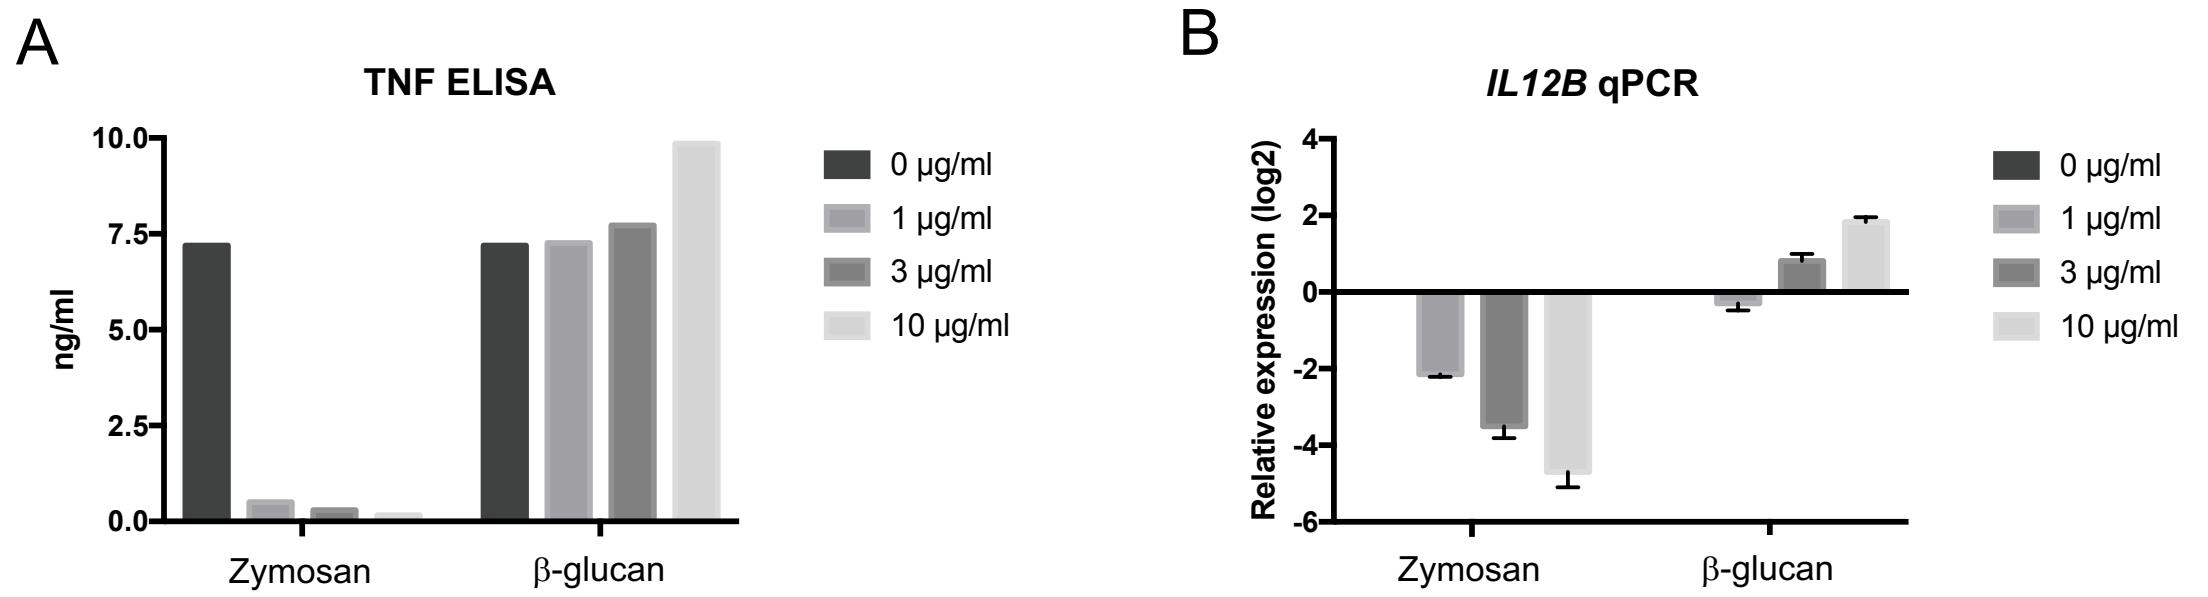

**Figure S1: Differential training effects are not a function of dose. (A)** TNF ELISA from supernatants of macrophages stimulated with LPS for eight hours, after training with the indicated doses of zymosan or  $\beta$ -glucan from ETSU. **(B)** qPCR for *IL12B* in macrophages, same conditions as (A).

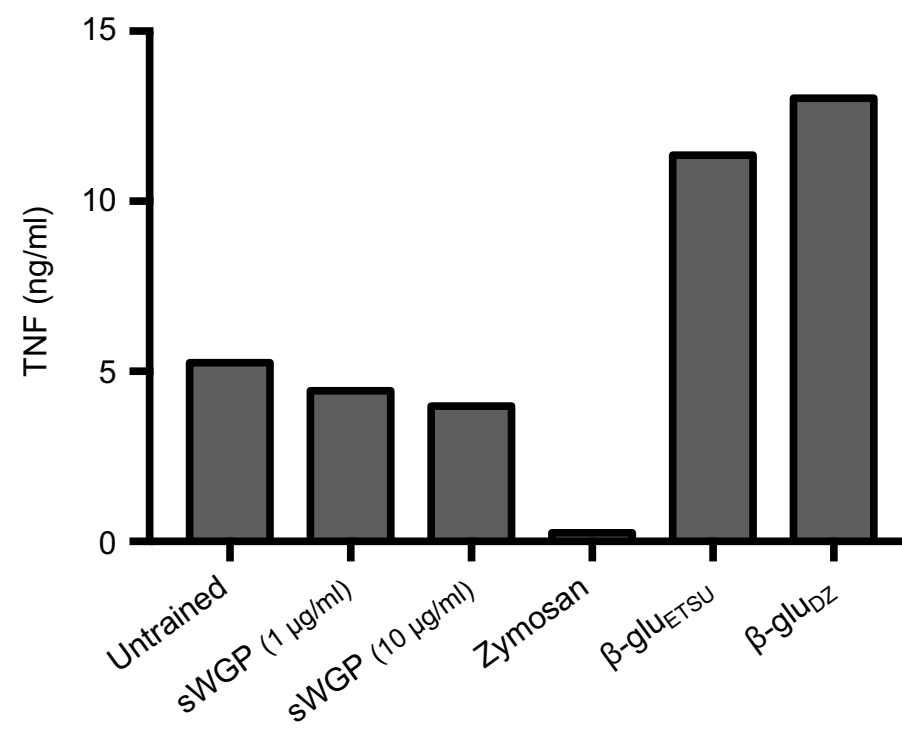

**Figure S2: Soluble  $\beta$ -glucans do not induce immune training.** TNF ELISA from supernatants of macrophages stimulated with LPS for eight hours, after training with the indicated ligands; sWGP = soluble whole glucan particle,  $\beta$ -glu<sub>ETSU</sub> =  $\beta$ -glucan from East Tennessee State University,  $\beta$ -glu<sub>DZ</sub> = depleted zymosan

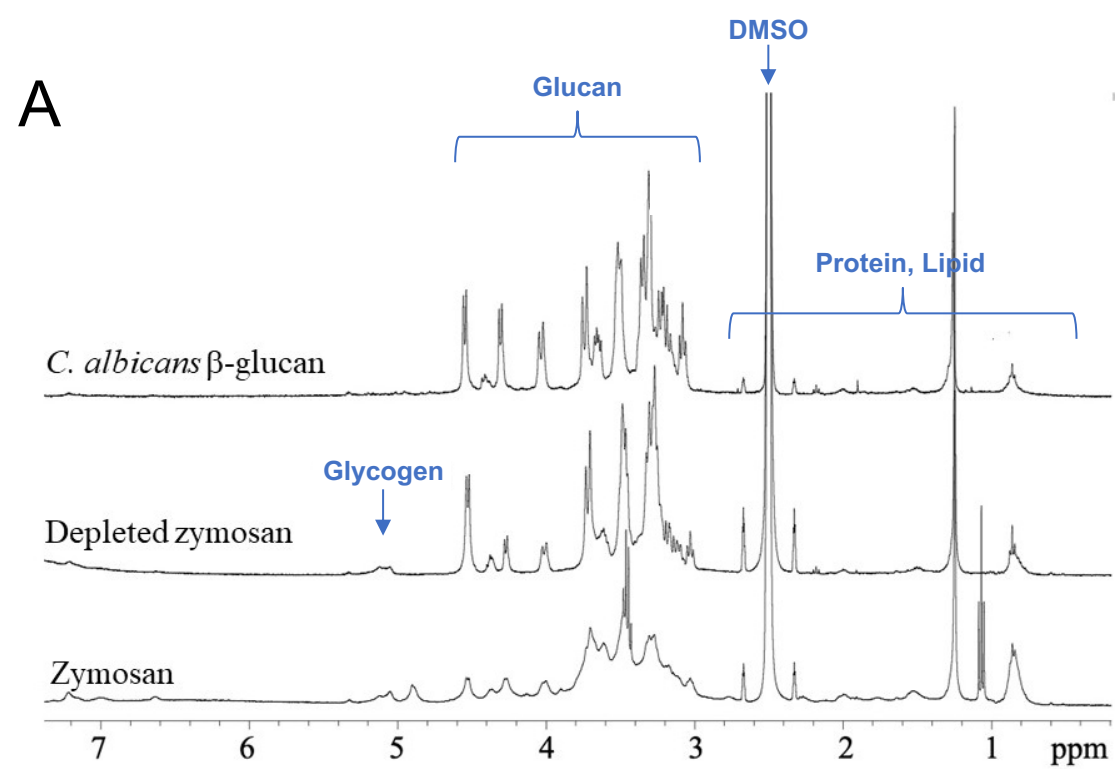

**B**

|                     | % carbohydrate | % glycogen | % glucan | 1-6 sidechain length | branching frequency |
|---------------------|----------------|------------|----------|----------------------|---------------------|
| Zymosan             | ND             | 29%        | ND       | ND                   | ND                  |
| Depleted zymosan    | 85%            | 11%        | 80%      | 4.2 repeats          | 12.4 repeats        |
| ETSU $\beta$ glucan | ~100%          | 0%         | ~100%    | 12.8 repeats         | 14.6 repeats        |

**Figure S3: NMR analysis of Dectin-1 ligands. (A)** NMR traces of each ligand. **(B)** Table of features of the carbohydrate component derived from NMR analysis; ND = unable to determine.

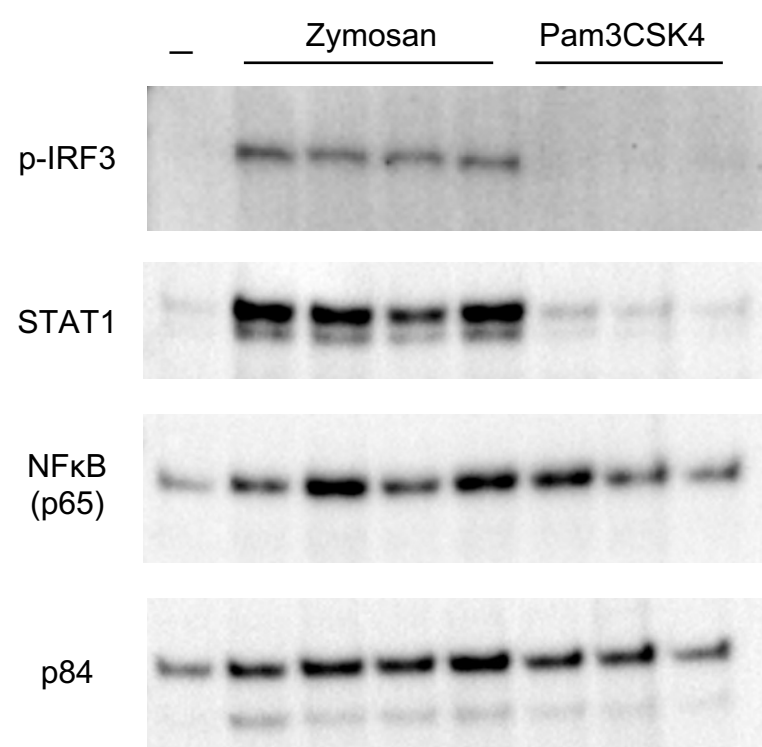

**Figure S4: Pam3CSK4 does not activate IRF3-STAT1 axis.** Immunoblot of nuclear extracts from Day 0 monocytes stimulated with Zymosan (1  $\mu$ g/ml) or Pam3CSK4 (100 ng/ml) for two hours; four replicates of each condition.
